# Supplementary material for: Generation and protective efficacy of a cold-adapted attenuated avian H9N2 influenza vaccine
Source: PubMed Central journal article supplement (PMC4960571; doi:10.1038/srep30382), 2016-07-26
Supplement: srep30382-s1.pdf [file srep30382-s1.pdf]

Supplementary Figure 1

for

**Generation and protective efficacy of a cold-adapted attenuated  
avian H9N2 influenza vaccine**

Yandi Wei, Lu Qi, Huijie Gao, Honglei Sun, Juan Pu, Yipeng Sun, and Jinhua Liu

A

|       |                                                                   |     |     |     |     |     |    |
|-------|-------------------------------------------------------------------|-----|-----|-----|-----|-----|----|
|       | 1                                                                 | 10  | 20  | 30  | 40  | 50  | 60 |
| WTPB2 | MERIKELRDLMSQSRTRREILT KTTVDHMAI IKKYTSGROEKNPALRMKMMAMKYPITAN    |     |     |     |     |     |    |
| CAPB2 | MERIKELRDLMSQSRTRREILT KTTVDHMAI IKKYTSGROEKNPALRMKMMAMKYPITAN    |     |     |     |     |     |    |
|       |                                                                   |     |     |     |     |     |    |
|       | 70                                                                | 80  | 90  | 100 | 110 | 120 |    |
| WTPB2 | KRIMEMIPERNEQQTLSKTN DAGSDRVMVSP LAVTWNNRNGPTTSTVHYPKVYKTYFE      |     |     |     |     |     |    |
| CAPB2 | KRIMEMIPERNEQQTLSKTN DAGSDRVMVSP LAVTWNNRNGPTTSTVHYPKVYKTYFE      |     |     |     |     |     |    |
|       |                                                                   |     |     |     |     |     |    |
|       | 130                                                               | 140 | 150 | 160 | 170 | 180 |    |
| WTPB2 | KVERLKHGTFGPVHF R NQVKIRRRVDINPGHADLSAKEAQDVIMEVVPNEVGARILTSE     |     |     |     |     |     |    |
| CAPB2 | KVERLKHGTFGPVHF Q NQVKIRRRVDINPGHADLSAKEAQDVIMEVVPNEVGARILTSE     |     |     |     |     |     |    |
|       |                                                                   |     |     |     |     |     |    |
|       | 190                                                               | 200 | 210 | 220 | 230 | 240 |    |
| WTPB2 | SOLTITKEKKELODCKIAPLMVAYMLERELVRKTRFLPVAGGTSSVYIEVLHLTQGTGW       |     |     |     |     |     |    |
| CAPB2 | SOLTITKEKKELODCKIAPLMVAYMLERELVRKTRFLPVAGGTSSVYIEVLHLTQGTGW       |     |     |     |     |     |    |
|       |                                                                   |     |     |     |     |     |    |
|       | 250                                                               | 260 | 270 | 280 | 290 | 300 |    |
| WTPB2 | EQMYTPGGKVRNDDVDQSLIIAARNIVRRAIVSADPLASLLEMCHSTOIGGVRMVDILRO      |     |     |     |     |     |    |
| CAPB2 | EQMYTPGGKVRNDDVDQSLIIAARNIVRRAIVSADPLASLLEMCHSTOIGGVRMVDILRO      |     |     |     |     |     |    |
|       |                                                                   |     |     |     |     |     |    |
|       | 310                                                               | 320 | 330 | 340 | 350 | 360 |    |
| WTPB2 | NPTEEQAVDICKAAMGLRISSSFSGGF TFKRTSGSSVKREEEVLTGNLQTLKIRVHEGY      |     |     |     |     |     |    |
| CAPB2 | NPTEEQAVDICKAAMGLRISSSFSGGF TFKRTSGSSVKREEEVLTGNLQTLKIRVHEGY      |     |     |     |     |     |    |
|       |                                                                   |     |     |     |     |     |    |
|       | 370                                                               | 380 | 390 | 400 | 410 | 420 |    |
| WTPB2 | EEFTMVGRRATAILRKATRRLIQ LIVSGKDEQSI AEAIIVAMVFSQEDCMIKAVRGDLNF    |     |     |     |     |     |    |
| CAPB2 | EEFTMVGRRATAILRKATRRLIQ LIVSGKDEQSI AEAIIVAMVFSQEDCMIKAVRGDLNF    |     |     |     |     |     |    |
|       |                                                                   |     |     |     |     |     |    |
|       | 430                                                               | 440 | 450 | 460 | 470 | 480 |    |
| WTPB2 | VNRANQRLNPMHQLLRHFQKDAKVL FQNWGIEPIDNVGMIGILPDMTPSTEMSLRGVRV      |     |     |     |     |     |    |
| CAPB2 | VNRANQRLNPMHQLLRHFQKDAKVL FQNWGIEPIDNVGMIGILPDMTPSTEMSLRGVRV      |     |     |     |     |     |    |
|       |                                                                   |     |     |     |     |     |    |
|       | 490                                                               | 500 | 510 | 520 | 530 | 540 |    |
| WTPB2 | SKMGVDEYSSAERVVVSIDRFLRV R DQRGNVLLSPEEVSETQTEKLTITYSSMMWEIN      |     |     |     |     |     |    |
| CAPB2 | SKMGVDEYSSAERVVVSIDRFLRV R DQRGNVLLSPEEVSETQTEKLTITYSSMMWEIN      |     |     |     |     |     |    |
|       |                                                                   |     |     |     |     |     |    |
|       | 550                                                               | 560 | 570 | 580 | 590 | 600 |    |
| WTPB2 | GPESVLVNTYQWII RNWETVKIQWSQDP TMLYNKMEFEPFQSLVPKAARGQYSGFVRVLF    |     |     |     |     |     |    |
| CAPB2 | GPESVLVNTYQWII RNWETVKIQWSQDP TMLYNKMEFEPFQSLVPKAARGQYSGFVRVLF    |     |     |     |     |     |    |
|       |                                                                   |     |     |     |     |     |    |
|       | 610                                                               | 620 | 630 | 640 | 650 | 660 |    |
| WTPB2 | QQMRDVLGTFD TVQIIKLLPFAAAPPEQSRMQFSSLT VNVVRGSGMIRIVVRGNSP VFNYNK |     |     |     |     |     |    |
| CAPB2 | QQMRDVLGTFD TVQIIKLLPFAAAPPEQSRMQFSSLT VNVVRGSGMIRIVVRGNSP VFNYNK |     |     |     |     |     |    |
|       |                                                                   |     |     |     |     |     |    |
|       | 670                                                               | 680 | 690 | 700 | 710 | 720 |    |
| WTPB2 | ATRRLTVLQKDGALMEDPDEGTS GVESAVLRGFLILGKEDKRYGPALSINELSNLAKGE      |     |     |     |     |     |    |
| CAPB2 | ATRRLTVLQKDGALMEDPDEGTS GVESAVLRGFLILGKEDKRYGPALSINELSNLAKGE      |     |     |     |     |     |    |
|       |                                                                   |     |     |     |     |     |    |
|       | 730                                                               | 740 | 750 |     |     |     |    |
| WTPB2 | KANVLIGQGDVVLVMKRRKRDSSIL TDSQTATKRIRMAIN                         |     |     |     |     |     |    |
| CAPB2 | KANVLIGQGDVVLVMKRRKRDSSIL TDSQTATKRIRMAIN                         |     |     |     |     |     |    |

## B

1 10 20 30 40 50 60  
WTPB1 MDVNP TLLFLKVPVQNAISTTFPYTGDPYPYSHGTGTGYTMDTVNRTHKYSEK GKWTNTE  
CAPB1 MDVNP TLLFLKVPVQNAISTTFPYTGDPYPYSHGTGTGYTMDTVNRTHKYSEK GKWTNTE

70 80 90 100 110 120  
WTPB1 TGAPQLNPIDG LPE DN E P S G Y A Q T D C V L E A M A F L E E S H P G I F E N S C L E T M E I V Q Q T R V D  
CAPB1 TGAPQLNPIDG LPE DN E P S G Y A Q T D C V L E A M A F L E E S H P G I F E N S C L E T M E I V Q Q T R V D

130 140 150 160 170 180  
WTPB1 KLTQGRQTYDWT LNRNQPAATALANTIEVFRSNGLTANESGRLIDFLKDVMSMDKEEME  
CAPB1 KLTQGRQTYDWT LNRNQPAATALANTIEVFRSNGLTANESGRLIDFLKDVMSMDKEEME

190 200 210 220 230 240  
WTPB1 ITTHFORKRRVRDNMTKKMVTQRTIGKKKQRLNKRSLIRALTLNMTKDAERGKLRRA  
CAPB1 ITTHFORKRRVRDNMTKKMVTQRTIGKKKQRLNKRSLIRALTLNMTKDAERGKLRRA

250 260 270 280 290 300  
WTPB1 IATPGMQIRGFVYFVEALARSICEKLEQSGLPVGGNEKKAKLANVVRKMMTNSQDTELSF  
CAPB1 IATPGMQIRGFVYFVEALARSICEKLEQSGLPVGGNEKKAKLANVVRKMMTRSQDTELSF

310 320 330 340 350 360  
WTPB1 TITGDNTKWNENQNP R M F L A M I T Y I T R N Q P E W F R N V L S I A P I M F S N K M A R L G K G Y M F E S K  
CAPB1 TITGDNTKWNENQNP R M F L A M I T Y I T R N Q P E W F R N V L S I A P I M F S N K M A R L G K G Y M F E S K

370 380 390 400 410 420  
WTPB1 SMKLRTOVPAEMLANIDLK YFNKSTREKIEKIRPLLIDGTASLSPGMMMGFMNMLSTVLG  
CAPB1 SMKLRTOVPAEMLANIDLK YFNKSTREKIEKIRPLLIDGTASLSPGMMMGFMNMLSTVLG

430 440 450 460 470 480  
WTPB1 VSILNLGQKKYTKNTYWDGLQSSDDFALIVNAPNHEG IQAGVDRFYRTCKLVGINMSKK  
CAPB1 VSILNLGQKKYTKNTYWDGLQSSDDFALIVNAPNHEG IQAGVDRFYRTCKLVGINMSKK

490 500 510 520 530 540  
WTPB1 KSYINRTGTFEFTSFFYRYGFVANFSMELPSPFGVSGINESADMSIGVTVIKNNMINNDLG  
CAPB1 KSYINRTGTFEFTSFFYRYGFVANFSMELPSPFGVSGINESADMSIGVTVIKNNMINNDLG

550 560 570 580 590 600  
WTPB1 PATAQMALQLFIKDYRYTYRCHRGDTQIQTRRAFELKKLWEQTRSKAGLLVSDGGPNLYN  
CAPB1 PATAQMALQLFIKDYRYTYRCHRGDTQIQTRRAFELKKLWEQTRSKAGLLVSDGGPNLYN

610 620 630 640 650 660  
WTPB1 IRLNH IPEVCLKWELMDEDYQGRLCNPINPFVSHKEIDSVNNAVVMPAHGPAKSMEYDAV  
CAPB1 IRLNH IPEVCLKWELMDEDYQGRLCNPINPFVSHKEIDSVNNAVVMPAHGPAKSMEYDAV

670 680 690 700 710 720  
WTPB1 ATTHSWIPKRRRSILNTSQRGVLEDEQMYQKCCNLF EKFFPSSSYRRPVGISSMVEAMVS  
CAPB1 ATTHSWIPKRRRSILNTSQRGVLEDEQMYQKCCNLF EKFFPSSSYRRPVGISSMVEAMVS

730 740 750  
WTPB1 RARIDARIDFESGGIKKEEFAEIMKICSTIEELRQK  
CAPB1 RARIDARIDFESGGIKKEEFAEIMKICSTIEELRQK

C

|      |                                                                                                                                                                                                                                                                                                                                                                                                                                                                   |     |     |     |     |     |    |
|------|-------------------------------------------------------------------------------------------------------------------------------------------------------------------------------------------------------------------------------------------------------------------------------------------------------------------------------------------------------------------------------------------------------------------------------------------------------------------|-----|-----|-----|-----|-----|----|
|      | 1                                                                                                                                                                                                                                                                                                                                                                                                                                                                 | 10  | 20  | 30  | 40  | 50  | 60 |
| WTPA | MEDFVRQCFNPMIVELAEKAMKEYGE <sup>D</sup> PKIETNKFASICTHLEVC <sup>F</sup> MYSD <sup>F</sup> HFI <sup>D</sup> ERGES                                                                                                                                                                                                                                                                                                                                                  |     |     |     |     |     |    |
| CAPA | MEDFVRQCFNPMIVELAEKAMKEYGE <sup>N</sup> PKIETNKFASICTHLEVC <sup>F</sup> MYSD <sup>F</sup> HFI <sup>D</sup> ERGES                                                                                                                                                                                                                                                                                                                                                  |     |     |     |     |     |    |
|      |                                                                                                                                                                                                                                                                                                                                                                                                                                                                   |     |     |     |     |     |    |
|      | 70                                                                                                                                                                                                                                                                                                                                                                                                                                                                | 80  | 90  | 100 | 110 | 120 |    |
| WTPA | TIIESGDPNALLKHRFEIIEGRDR <sup>T</sup> MAW <sup>T</sup> VVNSI <sup>C</sup> NTT <sup>G</sup> VEK <sup>P</sup> KFL <sup>P</sup> DL <sup>D</sup> Y <sup>D</sup> Y <sup>K</sup> EN <sup>R</sup> FI <sup>E</sup> I                                                                                                                                                                                                                                                      |     |     |     |     |     |    |
| CAPA | TIIESGDPNALLKHRFEIIEGRDR <sup>T</sup> MAW <sup>T</sup> VVNSI <sup>C</sup> NTT <sup>G</sup> VEK <sup>P</sup> KFL <sup>P</sup> DL <sup>D</sup> Y <sup>D</sup> Y <sup>K</sup> EN <sup>R</sup> FI <sup>E</sup> I                                                                                                                                                                                                                                                      |     |     |     |     |     |    |
|      |                                                                                                                                                                                                                                                                                                                                                                                                                                                                   |     |     |     |     |     |    |
|      | 130                                                                                                                                                                                                                                                                                                                                                                                                                                                               | 140 | 150 | 160 | 170 | 180 |    |
| WTPA | GVTRRE <sup>V</sup> H <sup>I</sup> Y <sup>L</sup> E <sup>K</sup> K <sup>A</sup> N <sup>K</sup> I <sup>K</sup> S <sup>E</sup> K <sup>T</sup> H <sup>I</sup> H <sup>I</sup> F <sup>S</sup> F <sup>T</sup> G <sup>E</sup> E <sup>M</sup> A <sup>T</sup> K <sup>A</sup> D <sup>Y</sup> T <sup>L</sup> D <sup>E</sup> E <sup>S</sup> R <sup>A</sup> R <sup>I</sup> K <sup>T</sup> R <sup>L</sup> F <sup>T</sup> I <sup>R</sup> H                                       |     |     |     |     |     |    |
| CAPA | GVTRRE <sup>V</sup> H <sup>I</sup> Y <sup>L</sup> E <sup>K</sup> K <sup>A</sup> N <sup>K</sup> I <sup>K</sup> S <sup>E</sup> K <sup>T</sup> H <sup>I</sup> H <sup>I</sup> F <sup>S</sup> F <sup>T</sup> G <sup>E</sup> E <sup>M</sup> A <sup>T</sup> K <sup>A</sup> D <sup>Y</sup> T <sup>L</sup> D <sup>E</sup> E <sup>S</sup> R <sup>A</sup> R <sup>I</sup> K <sup>T</sup> R <sup>L</sup> F <sup>T</sup> I <sup>R</sup> H                                       |     |     |     |     |     |    |
|      |                                                                                                                                                                                                                                                                                                                                                                                                                                                                   |     |     |     |     |     |    |
|      | 190                                                                                                                                                                                                                                                                                                                                                                                                                                                               | 200 | 210 | 220 | 230 | 240 |    |
| WTPA | EMASRGLWDSFRQSERGEETIEERFEITG <sup>T</sup> MRRLADQSLPPNFSSLENFRAYVDGFEPNG                                                                                                                                                                                                                                                                                                                                                                                         |     |     |     |     |     |    |
| CAPA | EMASRGLWDSFRQSERGEETIEERFEITG <sup>T</sup> MRRLADQSLPPNFSSLENFRAYVDGFEPNG                                                                                                                                                                                                                                                                                                                                                                                         |     |     |     |     |     |    |
|      |                                                                                                                                                                                                                                                                                                                                                                                                                                                                   |     |     |     |     |     |    |
|      | 250                                                                                                                                                                                                                                                                                                                                                                                                                                                               | 260 | 270 | 280 | 290 | 300 |    |
| WTPA | CIEGKLSQMSKEV <sup>N</sup> ARIE <sup>P</sup> FL <sup>R</sup> TT <sup>P</sup> R <sup>L</sup> RL <sup>P</sup> NG <sup>P</sup> PCS <sup>Q</sup> RSK <sup>F</sup> LLMDALKLSIEDPSHEGE                                                                                                                                                                                                                                                                                  |     |     |     |     |     |    |
| CAPA | CIEGKLSQMSKEV <sup>N</sup> ARIE <sup>P</sup> FL <sup>R</sup> TT <sup>P</sup> R <sup>L</sup> RL <sup>P</sup> NG <sup>P</sup> PCS <sup>Q</sup> RSK <sup>F</sup> LLMDALKLSIEDPSHEGE                                                                                                                                                                                                                                                                                  |     |     |     |     |     |    |
|      |                                                                                                                                                                                                                                                                                                                                                                                                                                                                   |     |     |     |     |     |    |
|      | 310                                                                                                                                                                                                                                                                                                                                                                                                                                                               | 320 | 330 | 340 | 350 | 360 |    |
| WTPA | GIPLYDAIKCMK <sup>T</sup> FFG <sup>W</sup> K <sup>E</sup> <sup>P</sup> NI <sup>I</sup> K <sup>P</sup> HEK <sup>G</sup> IN <sup>P</sup> NYLL <sup>T</sup> WK <sup>Q</sup> V <sup>L</sup> AEL <sup>Q</sup> DIENEEK <sup>I</sup> P <sup>K</sup> T <sup>K</sup> N <sup>M</sup>                                                                                                                                                                                        |     |     |     |     |     |    |
| CAPA | GIPLYDAIKCMK <sup>T</sup> FFG <sup>W</sup> K <sup>E</sup> <sup>K</sup> NI <sup>I</sup> K <sup>P</sup> HEK <sup>G</sup> IN <sup>P</sup> NYLL <sup>T</sup> WK <sup>Q</sup> V <sup>L</sup> AEL <sup>Q</sup> DIENEEK <sup>I</sup> P <sup>K</sup> T <sup>K</sup> N <sup>M</sup>                                                                                                                                                                                        |     |     |     |     |     |    |
|      |                                                                                                                                                                                                                                                                                                                                                                                                                                                                   |     |     |     |     |     |    |
|      | 370                                                                                                                                                                                                                                                                                                                                                                                                                                                               | 380 | 390 | 400 | 410 | 420 |    |
| WTPA | K <sup>K</sup> T <sup>S</sup> Q <sup>L</sup> K <sup>W</sup> A <sup>L</sup> G <sup>E</sup> N <sup>M</sup> A <sup>P</sup> E <sup>K</sup> V <sup>D</sup> F <sup>E</sup> D <sup>C</sup> K <sup>D</sup> V <sup>N</sup> D <sup>L</sup> K <sup>Q</sup> Y <sup>S</sup> D <sup>E</sup> F <sup>E</sup> P <sup>R</sup> S <sup>L</sup> A <sup>C</sup> W <sup>I</sup> Q <sup>E</sup> F <sup>N</sup> K <sup>A</sup> C <sup>E</sup> L <sup>T</sup> D <sup>S</sup>                |     |     |     |     |     |    |
| CAPA | K <sup>K</sup> T <sup>S</sup> Q <sup>L</sup> K <sup>W</sup> A <sup>L</sup> G <sup>E</sup> N <sup>M</sup> A <sup>P</sup> E <sup>K</sup> V <sup>D</sup> F <sup>E</sup> D <sup>C</sup> K <sup>D</sup> V <sup>N</sup> D <sup>L</sup> K <sup>Q</sup> Y <sup>S</sup> D <sup>E</sup> F <sup>E</sup> P <sup>R</sup> S <sup>L</sup> A <sup>C</sup> W <sup>I</sup> Q <sup>E</sup> F <sup>N</sup> K <sup>A</sup> C <sup>E</sup> L <sup>T</sup> D <sup>S</sup>                |     |     |     |     |     |    |
|      |                                                                                                                                                                                                                                                                                                                                                                                                                                                                   |     |     |     |     |     |    |
|      | 430                                                                                                                                                                                                                                                                                                                                                                                                                                                               | 440 | 450 | 460 | 470 | 480 |    |
| WTPA | S <sup>W</sup> V <sup>E</sup> L <sup>D</sup> E <sup>I</sup> G <sup>E</sup> D <sup>V</sup> A <sup>P</sup> I <sup>E</sup> H <sup>I</sup> A <sup>S</sup> M <sup>R</sup> R <sup>N</sup> Y <sup>F</sup> T <sup>A</sup> E <sup>V</sup> S <sup>H</sup> C <sup>R</sup> A <sup>T</sup> E <sup>Y</sup> I <sup>M</sup> K <sup>G</sup> V <sup>Y</sup> I <sup>N</sup> T <sup>A</sup> L <sup>L</sup> N <sup>A</sup> S <sup>C</sup> A <sup>A</sup> M <sup>D</sup> D <sup>F</sup> |     |     |     |     |     |    |
| CAPA | S <sup>W</sup> V <sup>E</sup> L <sup>D</sup> E <sup>I</sup> G <sup>E</sup> D <sup>V</sup> A <sup>P</sup> I <sup>E</sup> H <sup>I</sup> A <sup>S</sup> M <sup>R</sup> R <sup>N</sup> Y <sup>F</sup> T <sup>A</sup> E <sup>V</sup> S <sup>H</sup> C <sup>R</sup> A <sup>T</sup> E <sup>Y</sup> I <sup>M</sup> K <sup>G</sup> V <sup>Y</sup> I <sup>N</sup> T <sup>A</sup> L <sup>L</sup> N <sup>A</sup> S <sup>C</sup> A <sup>A</sup> M <sup>D</sup> D <sup>F</sup> |     |     |     |     |     |    |
|      |                                                                                                                                                                                                                                                                                                                                                                                                                                                                   |     |     |     |     |     |    |
|      | 490                                                                                                                                                                                                                                                                                                                                                                                                                                                               | 500 | 510 | 520 | 530 | 540 |    |
| WTPA | Q <sup>L</sup> I <sup>P</sup> M <sup>I</sup> S <sup>K</sup> R <sup>T</sup> K <sup>E</sup> G <sup>R</sup> R <sup>K</sup> T <sup>N</sup> L <sup>Y</sup> G <sup>F</sup> I <sup>I</sup> K <sup>G</sup> R <sup>S</sup> H <sup>L</sup> R <sup>N</sup> D <sup>T</sup> D <sup>V</sup> V <sup>N</sup> F <sup>S</sup> M <sup>E</sup> F <sup>S</sup> L <sup>T</sup> D <sup>P</sup> R <sup>L</sup> E <sup>P</sup> H <sup>K</sup> W <sup>E</sup> K <sup>Y</sup>                |     |     |     |     |     |    |
| CAPA | Q <sup>L</sup> I <sup>P</sup> M <sup>I</sup> S <sup>K</sup> R <sup>T</sup> K <sup>E</sup> G <sup>R</sup> R <sup>K</sup> T <sup>N</sup> L <sup>Y</sup> G <sup>F</sup> I <sup>I</sup> K <sup>G</sup> R <sup>S</sup> H <sup>L</sup> R <sup>N</sup> D <sup>T</sup> D <sup>V</sup> V <sup>N</sup> F <sup>S</sup> M <sup>E</sup> F <sup>S</sup> L <sup>T</sup> D <sup>P</sup> R <sup>L</sup> E <sup>P</sup> H <sup>K</sup> W <sup>E</sup> K <sup>Y</sup>                |     |     |     |     |     |    |
|      |                                                                                                                                                                                                                                                                                                                                                                                                                                                                   |     |     |     |     |     |    |
|      | 550                                                                                                                                                                                                                                                                                                                                                                                                                                                               | 560 | 570 | 580 | 590 | 600 |    |
| WTPA | C <sup>V</sup> L <sup>E</sup> I <sup>G</sup> D <sup>M</sup> L <sup>L</sup> R <sup>T</sup> A <sup>V</sup> G <sup>Q</sup> V <sup>S</sup> R <sup>P</sup> M <sup>F</sup> L <sup>Y</sup> V <sup>R</sup> T <sup>N</sup> G <sup>T</sup> S <sup>K</sup> I <sup>K</sup> M <sup>K</sup> W <sup>G</sup> M <sup>E</sup> M <sup>R</sup> R <sup>C</sup> L <sup>L</sup> Q <sup>S</sup> L <sup>Q</sup> Q <sup>I</sup> E <sup>S</sup> M <sup>I</sup> E <sup>A</sup> E <sup>S</sup> |     |     |     |     |     |    |
| CAPA | C <sup>V</sup> L <sup>E</sup> I <sup>G</sup> D <sup>M</sup> L <sup>L</sup> R <sup>T</sup> A <sup>V</sup> G <sup>Q</sup> V <sup>S</sup> R <sup>P</sup> M <sup>F</sup> L <sup>Y</sup> V <sup>R</sup> T <sup>N</sup> G <sup>T</sup> S <sup>K</sup> I <sup>K</sup> M <sup>K</sup> W <sup>G</sup> M <sup>E</sup> M <sup>R</sup> R <sup>C</sup> L <sup>L</sup> Q <sup>S</sup> L <sup>Q</sup> Q <sup>I</sup> E <sup>S</sup> M <sup>I</sup> E <sup>A</sup> E <sup>S</sup> |     |     |     |     |     |    |
|      |                                                                                                                                                                                                                                                                                                                                                                                                                                                                   |     |     |     |     |     |    |
|      | 610                                                                                                                                                                                                                                                                                                                                                                                                                                                               | 620 | 630 | 640 | 650 | 660 |    |
| WTPA | S <sup>V</sup> K <sup>E</sup> K <sup>D</sup> L <sup>T</sup> K <sup>E</sup> F <sup>F</sup> E <sup>N</sup> K <sup>S</sup> E <sup>T</sup> W <sup>P</sup> I <sup>G</sup> E <sup>S</sup> P <sup>K</sup> G <sup>V</sup> E <sup>E</sup> G <sup>S</sup> I <sup>G</sup> K <sup>V</sup> C <sup>R</sup> T <sup>L</sup> L <sup>A</sup> K <sup>S</sup> V <sup>F</sup> N <sup>S</sup> L <sup>Y</sup> A <sup>S</sup> P <sup>Q</sup> L <sup>E</sup> G <sup>F</sup> S <sup>A</sup> |     |     |     |     |     |    |
| CAPA | S <sup>V</sup> K <sup>E</sup> K <sup>D</sup> L <sup>T</sup> K <sup>E</sup> F <sup>F</sup> E <sup>N</sup> K <sup>S</sup> E <sup>T</sup> W <sup>P</sup> I <sup>G</sup> E <sup>S</sup> P <sup>K</sup> G <sup>V</sup> E <sup>E</sup> G <sup>S</sup> I <sup>G</sup> K <sup>V</sup> C <sup>R</sup> T <sup>L</sup> L <sup>A</sup> K <sup>S</sup> V <sup>F</sup> N <sup>S</sup> L <sup>Y</sup> A <sup>S</sup> P <sup>Q</sup> L <sup>E</sup> G <sup>F</sup> S <sup>A</sup> |     |     |     |     |     |    |
|      |                                                                                                                                                                                                                                                                                                                                                                                                                                                                   |     |     |     |     |     |    |
|      | 670                                                                                                                                                                                                                                                                                                                                                                                                                                                               | 680 | 690 | 700 | 710 |     |    |
| WTPA | E <sup>S</sup> R <sup>K</sup> L <sup>L</sup> L <sup>I</sup> V <sup>Q</sup> A <sup>L</sup> R <sup>D</sup> N <sup>L</sup> E <sup>P</sup> G <sup>T</sup> F <sup>D</sup> L <sup>E</sup> G <sup>L</sup> Y <sup>E</sup> A <sup>I</sup> E <sup>E</sup> C <sup>L</sup> I <sup>N</sup> D <sup>F</sup> W <sup>V</sup> L <sup>L</sup> N <sup>A</sup> S <sup>W</sup> F <sup>N</sup> S <sup>F</sup> L <sup>T</sup> H <sup>A</sup> Q <sup>R</sup>                               |     |     |     |     |     |    |
| CAPA | E <sup>S</sup> R <sup>K</sup> L <sup>L</sup> L <sup>I</sup> V <sup>Q</sup> A <sup>L</sup> R <sup>D</sup> N <sup>L</sup> E <sup>P</sup> G <sup>T</sup> F <sup>D</sup> L <sup>E</sup> G <sup>L</sup> Y <sup>E</sup> A <sup>I</sup> E <sup>E</sup> C <sup>L</sup> I <sup>N</sup> D <sup>F</sup> W <sup>V</sup> L <sup>L</sup> N <sup>A</sup> S <sup>W</sup> F <sup>N</sup> S <sup>F</sup> L <sup>T</sup> H <sup>A</sup> Q <sup>R</sup>                               |     |     |     |     |     |    |

# D

1 10 20 30 40 50 60  
WTHA DKICIGYQSTNSTETVDTLTENNVPVTHAKELLHTEHNGMLCATSLGHPLILDCTIEGL  
CAHA DKICIGYQSTNSTETVDTLTENNVPVTHAKELLHTEHNGMLCATSLGHPLILDCTIEGL

70 80 90 100 110 120  
WTHA IYGNPSCDLLLGGREWSYIVERPSAVNGLCYPGNVENLEELRSLFSSARSYQRIQIFPDT  
CAHA IYGNPSCDLLLGGREWSYIVERPSAVNGLCYPGNVENLEELRSLFSSARSYQRIQIFPDT

130 140 150 160 170 180  
WTHA IWNVSYSGTSKACSDSFYRSMRWLTQKNNAYPIQDAQYTNNQEKNILFMWGINHPPTDTA  
CAHA IWNVSYSGTSKACSDSFYRSMRWLTQKNNAYPIQDAQYTNNQEKNILFMWGINHPPTDTA

190 200 210 220 230 240  
WTHA QTNLYTRDTTTSVATEEINRTFKPLIGPRPLVNGIQGRIDYYWSVLKPGQTLRIRSNGN  
CAHA QTNLYTRDTTTSVATEEINRTFKPLIGPRPLVNGIQGRIDYYWSVLKPGQTLRIRSNGN

250 260 270 280 290 300  
WTHA LIAPWYGHILSGESHGRILKTDLKRGSCTVQCQTEKGLNTTLPFQNVSKYAFGNCSKYI  
CAHA LIAPWYGHILSGESHGRILKTDLKRGSCTVQCQTEKGLNTTLPFQNVSKYAFGNCSKYI

310 320 330 340 350 360  
WTHA GIKSLKLAVALRNVPSSRSLFGAIAGFIEGGWSGLVAGWYGFQHSNDQGVGMAADRDS  
CAHA GIKSLKLAVALRNVPSSRSLFGAIAGFIEGGWSGLVAGWYGFQHSNDQGVGMAADRDS

370 380 390 400 410 420  
WTHA TQKAIDKITSKVNNIVDKMNKQYEIIDHEFSEVETRLNMINNKIDDQIQDIWAYNAELLV  
CAHA TQKAIDKITSKVNNIVDKMNKQYEIIDHEFSEVETRLNMINNKIDDQIQDIWAYNAELLV

430 440 450 460 470 480  
WTHA LLENQKTLDLDEHDANVNNLYNKVKRALGSSNAVEDGKGCFFELYHKCDDQCMETIRNGTYNRR  
CAHA LLENQKTLDLDEHDANVNNLYNKVKRALGSSNAVEDGKGCFFELYHKCDDQCMETIRNGTYNRR

490 500 510 520 530 540  
WTHA KYQEEKLERQKIEGVKLESEGTYKILTIYSTVASSIVIAMGFAAFLEWAMSNNGSCRCNI  
CAHA KYQEEKLERQKIEGVKLESEGTYKILTIYSTVASSIVIAMGFAAFLEWAMSNNGSCRCNI

WTHA CI  
CAHA CI

# E

WTNP 1 10 20 30 40 50 60  
CANP MASQGTKRSYEQMETGDRONATEIRASVGRMVSGIGRFYIQMCTELKLSDNEGRLIQNS  
MASQGTKRSYEQMETGRDRONATEIRASVGRMVSGIGRFYIQMCTELKLSDNEGRLIQNS

WTNP 70 80 90 100 110 120  
CANP ITIERMVLSAFDERRNRYLEEHP SAGKDPKKTGGPIYRRRDGKQVRELILYDKEEIRRIW  
ITIERMVLSAFDERRNRYLEEHP SAGKDPKKTGGPIYRRRDGKQVRELILYDKEEIRRIW

WTNP 130 140 150 160 170 180  
CANP ROANNGEDATAGLTHLMIWHSNLNDATYQRTALVRTGMDPRMCSLMQGSTLPRRSGAAG  
ROANNGEDATAGLTHLMIWHSNLNDATYQRTALVRTGMDPRMCSLMQGSTLPRRSGAAG

WTNP 190 200 210 220 230 240  
CANP AAVKGI GTMVMELIRMIKRGINDRNFWRGNGRRTRIA YERM CNILKGFQTAAQRAMMD  
AAVKGI GTMVMELIRMIKRGINDRNFWRGNGRRTRIA YERM CNILKGFQTAAQRAMMD

WTNP 250 260 270 280 290 300  
CANP QVRESRNP GNAEIEDLIFLARSALILRGSVAHK SCLPACVYGLAVASGYDFEREGYSLVG  
QVRESRNP GNAEIEDLIFLARSALILRGSVAHK SCLPACVYGLAVASGYDFEREGYSLVG

WTNP 310 320 330 340 350 360  
CANP IDPFRL LONSQVFS LIRPNENPAHKSQ L VVMACHSAAFEDLRVSSFIRGTRMVPRGQLST  
IDPFRL LONSQVFS LIRPNENPAHKSQ L VVMACHSAAFEDLRVSSFIRGTRMVPRGQLST

WTNP 370 380 390 400 410 420  
CANP RGVOIASNENIEAMD SNTLELRSRYWAIRTKSGGNTNQORASAGQVSVQPTFSVQRNLPF  
RGVOIASNENIEAMD SNTLELRSRYWAIRTKSGGNTNQORASAGQVSVQPTFSVQRNLPF

WTNP 430 440 450 460 470 480  
CANP ERATIMAAFTGNTEGRTSDMRTEIIRMMESARPEDV SFQGRGVFELSDEKATNP IVPSFD  
ERATIMAAFTGNTEGRTSDMRTEIIRMMESARPEDV SFQGRGVFELSDEKATNP IVPSFD

WTNP 490  
CANP MNNEGSYFFGDNAEEYDN  
MNNEGSYFFGDNAEEYDN

## F

```
      1      10      20      30      40      50      60
WTNS1 MDSNTVSSFQVDCFLWHVRKRKFADQELGDAPFLDRLRRDQKSLRGRSSTLGDIRTATRE
CANS1 MDSNTVSSFQVDCFLWHVRKRKFADQELGDAPFLDRLRRDQKSLRGRSSTLGDIRTATRE

      70      80      90      100     110     120
WTNS1 GKHIVERILEEESDEAFKMTIASVPAPRYLTDMTLEEMSRDWLMLIPKQKVTGSLCIRME
CANS1 GKHIVERILEEESDEAFKMTIASVPAPRYLTDMTLEEMSRDWLMLIPKQKVTGSLCIRME

      130     140     150     160     170     180
WTNS1 QAIVDKNITLKANFIVIFNRLEALILLRAFTDEGAIVGEISPLPSLPGHTDKDVKNAIGV
CANS1 QAIVDKNITLKANFIVIFNRLEALILLRAFTDEGAIVGEISPLPSLPGHTDKDVKNAIGV

      190     200     210
WTNS1 LIGCFEWNNDTVRVSETLQRFARWRSSEDEDGRPPLSPK
CANS1 LIGRFEWNNDTVRVSETLQRFARWRSSEDEDGRPPLSPK
```

**Fig. S1. Amino acid sequences of the SD/01/10- wt and ca mutant viruses.**

Identical sequences of PB2 (A), PB1 (B), PA (C), HA (D), NP (E), NS1(F) are shown in red, amino acid changes detected in the ca mutant viruses are shown in white.
