# Supplementary material for: Generation and protective efficacy of a cold-adapted attenuated avian H9N2 influenza vaccine
Source: PubMed Central journal article supplement (PMC4960571; doi:10.1038/srep30382), 2016-07-26
Supplement: srep30382-s2.pdf [file srep30382-s2.pdf]

Supplementary Figure 2

for

**Generation and protective efficacy of a cold-adapted attenuated  
avian H9N2 influenza vaccine**

Yandi Wei, Lu Qi, Huijie Gao, Honglei Sun, Juan Pu, Yipeng Sun, and Jinhua Liu

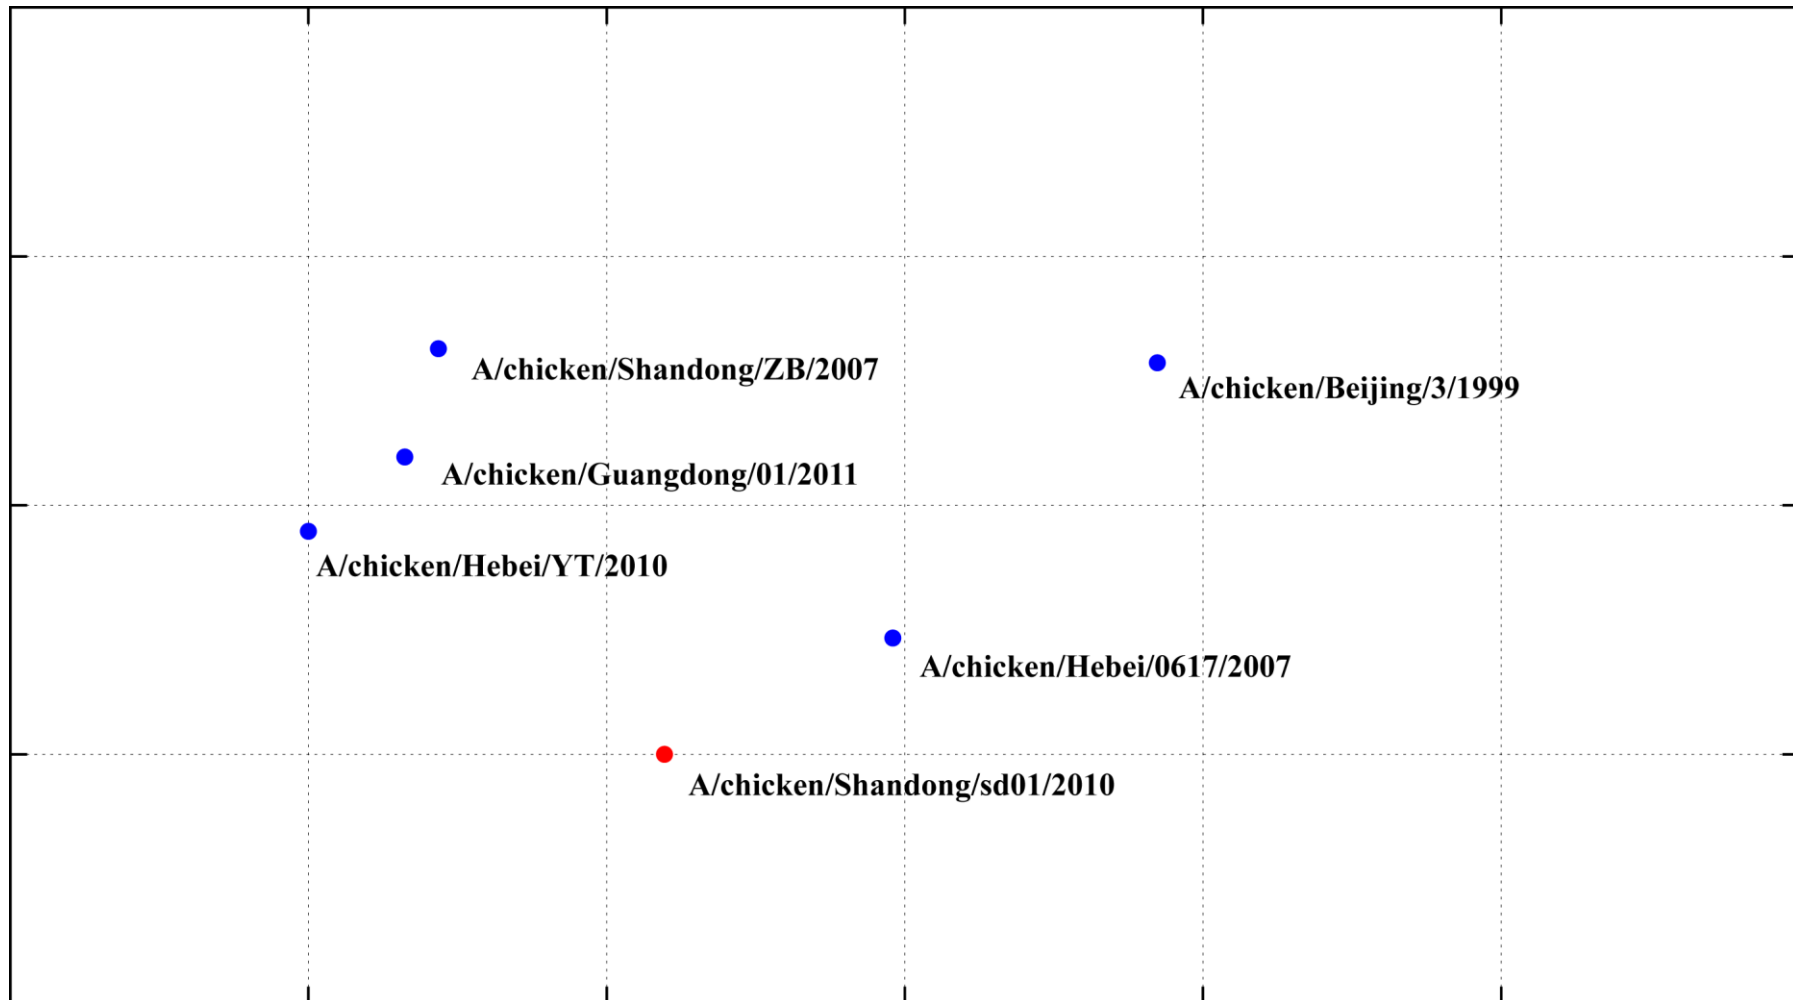

**Fig. S2. Antigenic cartography representation of viruses used in challenge experiment.** The map was produced using AntigenMap

(<http://sysbio.cvm.msstate.edu/AntigenMap>). One unit (grid) represents a 2-fold change in the HI assay results. Red circle indicate the vaccine strain.
